# Supplementary material for: The Mitochondrial Genomes of the Zoonotic Canine Filarial Parasites Dirofilaria (Nochtiella) repens and Candidatus Dirofilaria (Nochtiella) Honkongensis Provide Evidence for Presence of Cryptic Species
Source: PubMed Central journal article supplement (PMC5058507; doi:10.1371/journal.pntd.0005028), 2016-10-11
Supplement: pntd.0005028.s001.pdf [file pntd.0005028.s001.pdf]

**S1 Table. PCR primer sequences and annealing temperatures**

| Primer name          | Primer sequence (5'→3')                                                  | Annealing temperature |
|----------------------|--------------------------------------------------------------------------|-----------------------|
| Drep1for<br>Drep1rev | TATTTTAAATTTTCGATTAAGATT<br>AAAACAGAATTATAAACCTGACCA                     | 57 °C                 |
| Drep2for<br>Drep2rev | GGTTTATTTTGTATTAGTATGAA<br>TATACTTCCAAAATTCCATATATAACT                   | 54 °C                 |
| Drep3for<br>Drep3rev | TACTATATCTGATTACGGCTCAGCTAG<br>AATT<br>AAATTAAGAACCTCAAACATATAATAA<br>AC | 64 °C                 |
| Drep4for<br>Drep4rev | TTATGATATGTCTATTGATTATTG<br>CCTATATCTTTCAAATATTATTC                      | 51.5 °C               |
| Drep5for<br>Drep5rev | CTTGTGCTCAGAGATATTCTTATGA<br>AAAAATATACAACATCGATGTAG                     | 60.4 °C               |
| Drep6for<br>Drep6rev | TAAAAGTAGCGTAAGTGATTG<br>AAAAATAATAACCACAAATCTCCTGA                      | 60.4 °C               |
