# Supplementary material for: The Mitochondrial Genomes of the Zoonotic Canine Filarial Parasites Dirofilaria (Nochtiella) repens and Candidatus Dirofilaria (Nochtiella) Honkongensis Provide Evidence for Presence of Cryptic Species
Source: PubMed Central journal article supplement (PMC5058507; doi:10.1371/journal.pntd.0005028), 2016-10-11
Supplement: pntd.0005028.s002.pdf [file pntd.0005028.s002.pdf]

**S2 Table. Mapping and assembly parameters for CLC Genomics Workbench 7.0.4**

|                                | Mapping parameters                                | Assembly parameters              |
|--------------------------------|---------------------------------------------------|----------------------------------|
| Masking mode                   | no masking                                        | Map reads back to contigs (slow) |
| Update contigs                 |                                                   | Yes                              |
| Automatic bubble size          |                                                   | Yes                              |
| Minimum contig length          |                                                   | 1000                             |
| Automatic word size            |                                                   | Yes                              |
| Perform scaffolding            |                                                   | No                               |
| Auto-detect paired distances   |                                                   | Yes                              |
| Mismatch cost                  | 2                                                 | 2                                |
| Insertion cost                 | 3                                                 | 3                                |
| Deletion cost                  | 3                                                 | 3                                |
| Length fraction                | 0.85                                              | 0.85                             |
| Similarity fraction            | 0.85                                              | 0.85                             |
| Global alignment               | No                                                |                                  |
| Auto-detect paired distances   | Yes                                               |                                  |
| Non-specific match handling    | map randomly<br>= create stand-alone read mapping | Output mode                      |
| Create list of un-mapped reads |                                                   | No                               |
