# Supplementary material for: The Mitochondrial Genomes of the Zoonotic Canine Filarial Parasites Dirofilaria (Nochtiella) repens and Candidatus Dirofilaria (Nochtiella) Honkongensis Provide Evidence for Presence of Cryptic Species
Source: PubMed Central journal article supplement (PMC5058507; doi:10.1371/journal.pntd.0005028), 2016-10-11
Supplement: pntd.0005028.s003.pdf [file pntd.0005028.s003.pdf]

**S3 Table. MiSeq read information**

|                     |                  | <b>Sample ID</b>       |                            |                          |
|---------------------|------------------|------------------------|----------------------------|--------------------------|
|                     |                  | <b>AW (dog, Italy)</b> | <b>S8 (human, Croatia)</b> | <b>S6 (human, India)</b> |
| <b>Raw Reads</b>    | Number           | 2,842,040              | 2,290,512                  | 5,751,974                |
|                     | Nucleotides      | 467,156,581            | 257,472,454                | 810,753,057              |
|                     | Phred Score >=30 | 78.72%                 | 93.44%                     | 94.27%                   |
|                     | Average length   | 164                    | 112                        | 141                      |
| <b>Mapped Reads</b> | Number           | 27,678                 | 20,441                     | 307,416                  |
|                     | Nucleotides      | 3,059,234              | 2,035,914                  | 48,487,366               |
|                     | average length   | 110                    | 100                        | 158                      |
|                     | Coverage         | 224                    | 147                        | 3545                     |
