# Supplementary material for: The Mitochondrial Genomes of the Zoonotic Canine Filarial Parasites Dirofilaria (Nochtiella) repens and Candidatus Dirofilaria (Nochtiella) Honkongensis Provide Evidence for Presence of Cryptic Species
Source: PubMed Central journal article supplement (PMC5058507; doi:10.1371/journal.pntd.0005028), 2016-10-11
Supplement: pntd.0005028.s004.pdf [file pntd.0005028.s004.pdf]

**S4 Table. Nucleotide identity (%) in pairwise comparisons between complete mitochondrial genomes of members of the genera *Dirofilaria* and *Onchocerca*.**

|                            |                          | <i>D. repens</i> |          |          |          | <i>C. D. hongkongensis</i> | <i>D. immitis</i> | <i>O. volvulus</i> | <i>O. ochengi</i>        | <i>O. flexuosa</i> |
|----------------------------|--------------------------|------------------|----------|----------|----------|----------------------------|-------------------|--------------------|--------------------------|--------------------|
|                            | Accession no.            | Accession no.    |          |          |          |                            |                   |                    |                          |                    |
| Species                    | Accession no.            | KX265047         | KX265048 | KX265049 | KR071802 | KX265050                   | AJ537512          | AF015193           | mOo.2.0.fna <sup>a</sup> | HQ214004           |
| <i>D. repens</i>           | KX265047                 |                  | 99       | 99       | 99       | 94                         | 87                | 86                 | 86                       | 86                 |
|                            | KX265048                 | 99               |          | 99       | 99       | 94                         | 87                | 86                 | 86                       | 86                 |
|                            | KX265049                 | 99               | 99       |          | 99       | 94                         | 87                | 86                 | 86                       | 86                 |
|                            | KR071802                 | 99               | 99       | 99       |          | 94                         | 87                | 86                 | 86                       | 86                 |
| <i>C. D. hongkongensis</i> | KX265050                 | 94               | 94       | 94       | 94       |                            | 85                | 85                 | 85                       | 85                 |
| <i>D. immitis</i>          | AJ537512                 | 87               | 87       | 87       | 87       | 85                         |                   | 84                 | 85                       | 85                 |
| <i>O. volvulus</i>         | AF015193                 | 86               | 86       | 86       | 86       | 85                         | 84                |                    | 97                       | 89                 |
| <i>O. ochengi</i>          | mOo.2.0.fna <sup>a</sup> | 86               | 86       | 86       | 86       | 85                         | 85                | 97                 |                          | 89                 |
| <i>O. flexuosa</i>         | HQ214004                 | 86               | 86       | 86       | 86       | 85                         | 84                | 89                 | 89                       |                    |

Comparisons within *D. repens* are labelled green, while most inter-species comparisons are labeled red. The comparisons within sibling species pairs, i.e. *D. repens* vs. *C. D. hongkongensis* and *O. volvulus* vs. *O. ochengi*, are marked in yellow.

<sup>a</sup>Internal designation and not a GenBank accession number.
