# Supplementary material for: The Mitochondrial Genomes of the Zoonotic Canine Filarial Parasites Dirofilaria (Nochtiella) repens and Candidatus Dirofilaria (Nochtiella) Honkongensis Provide Evidence for Presence of Cryptic Species
Source: PubMed Central journal article supplement (PMC5058507; doi:10.1371/journal.pntd.0005028), 2016-10-11
Supplement: pntd.0005028.s005.pdf [file pntd.0005028.s005.pdf]

**S5 Table. Nucleotide identity (%) and amino acid identity (similarity) (%) in pairwise comparisons between protein and rRNA coding genes in the mitochondrial genomes of *Dirofilaria repens*, *Candidatus Dirofilaria hongkongensis* (C. D. hong.) and *Dirofilaria immitis*.**

| Gene          | <i>D. repens</i> /C. D. hong. |             | <i>D. repens</i> / <i>D. immitis</i> |             | C. D. hong./ <i>D. immitis</i> |             |
|---------------|-------------------------------|-------------|--------------------------------------|-------------|--------------------------------|-------------|
|               | cDNA                          | Protein     | cDNA                                 | Protein     | cDNA                           | Protein     |
| <i>nduo-2</i> | 92.5                          | 97.5 (98.2) | 84.3                                 | 79.2 (89.8) | 83.2                           | 80.6 (90.1) |
| <i>nduo-4</i> | 93.6                          | 94.6 (98.8) | 88.3                                 | 86.1 (93.9) | 88.0                           | 87.8 (94.1) |
| <i>ctc-1</i>  | 95.4                          | 98.2 (99.5) | 90.8                                 | 95.1 (97.3) | 90.0                           | 94.7 (97.4) |
| <i>nduo-6</i> | 90.7                          | 85.5 (90.1) | 84.5                                 | 79.6 (83.7) | 87.2                           | 82.0 (90.0) |
| <i>ctb-1</i>  | 94.9                          | 96.1 (99.2) | 88.4                                 | 87.8 (92.5) | 87.5                           | 85.6 (91.7) |
| <i>ctc-3</i>  | 93.1                          | 94.2 (98.1) | 88.5                                 | 83.7 (91.1) | 88.2                           | 86.4 (91.1) |
| <i>ndfl-4</i> | 95.5                          | 96.3 (97.5) | 90.1                                 | 86.3 (91.3) | 88.5                           | 82.5 (90)   |
| <i>rrnS</i>   | 97.5                          |             | 91.7                                 |             | 92.0                           |             |
| <i>nduo-1</i> | 95.1                          | 98.7 (99.7) | 88.2                                 | 86.3 (92.0) | 88.7                           | 87.0 (92.3) |
| <i>atp-6</i>  | 94.4                          | 94.2 (96.9) | 84.5                                 | 77.0 (78.0) | 84.9                           | 76.4 (83.8) |
| <i>ctc-2</i>  | 94.7                          | 96.1 (98.3) | 89.8                                 | 90.9 (97.4) | 89.4                           | 90.9 (96.6) |
| <i>rrnL</i>   | 96.6                          |             | 87.1                                 |             | 86.9                           |             |
| <i>nduo-3</i> | 96.1                          | 100         | 84.9                                 | 76.1 (82.9) | 85.8                           | 77.8 (83.8) |
| <i>nduo-5</i> | 95.2                          | 96.6 (97.7) | 88.2                                 | 84.0 (91.3) | 87.1                           | 83.0 (91.1) |
