# Supplementary material for: The Mitochondrial Genomes of the Zoonotic Canine Filarial Parasites Dirofilaria (Nochtiella) repens and Candidatus Dirofilaria (Nochtiella) Honkongensis Provide Evidence for Presence of Cryptic Species
Source: PubMed Central journal article supplement (PMC5058507; doi:10.1371/journal.pntd.0005028), 2016-10-11
Supplement: pntd.0005028.s006.pdf [file pntd.0005028.s006.pdf]

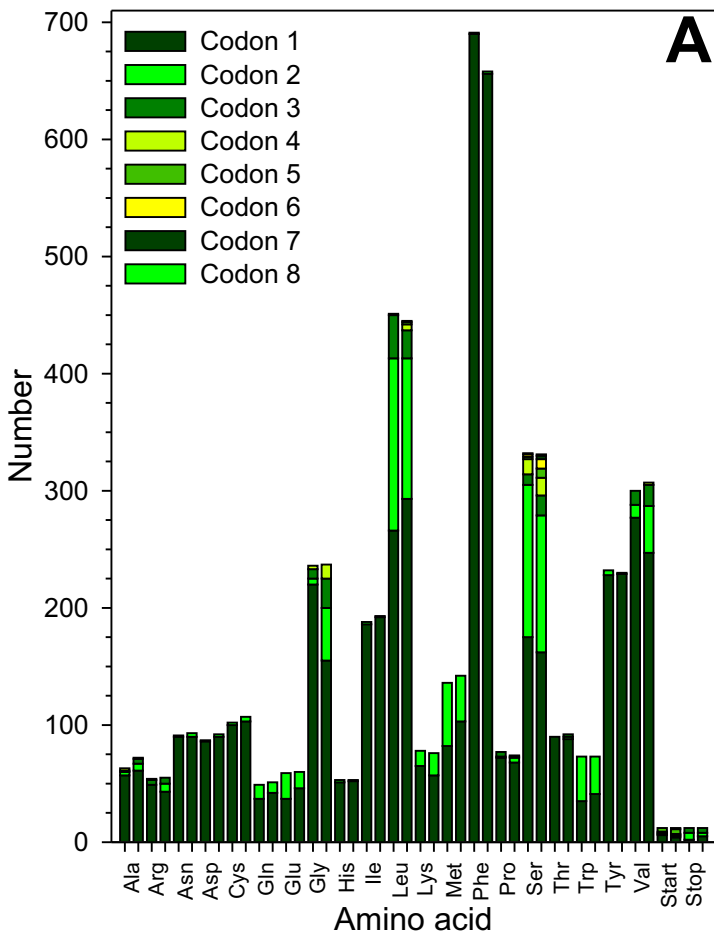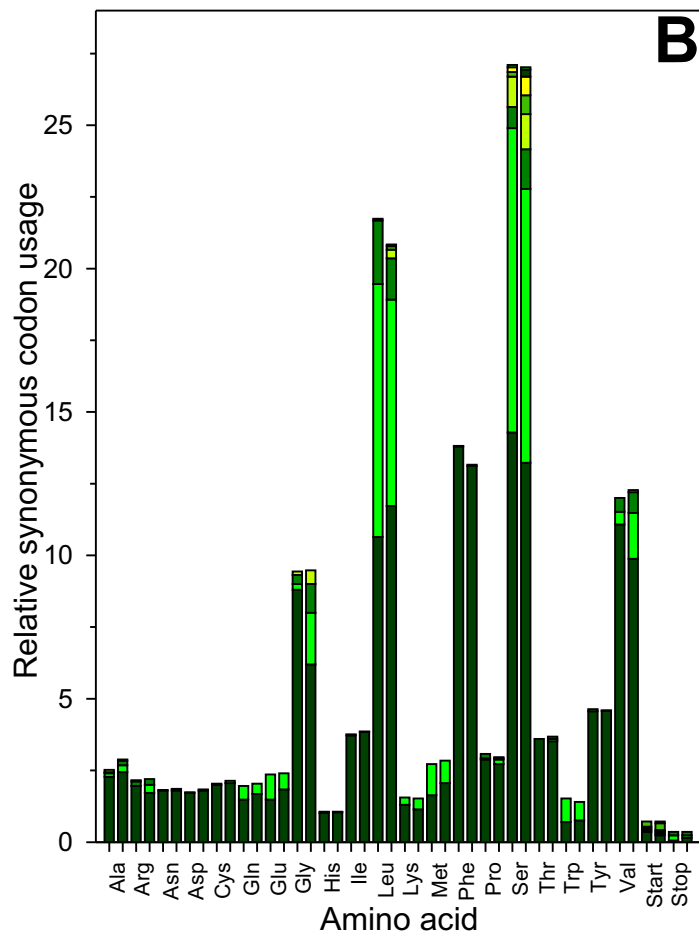

| Amino acid | Codon |     |     |     |     |     |     |     |
|------------|-------|-----|-----|-----|-----|-----|-----|-----|
|            | 1     | 2   | 3   | 4   | 5   | 6   | 7   | 8   |
| Ala        | GCT   | GCG | GCC | GCA |     |     |     |     |
| Arg        | CGT   | CGG | CGA | CGC |     |     |     |     |
| Asn        | AAT   | AAC |     |     |     |     |     |     |
| Asp        | TGT   | TGC |     |     |     |     |     |     |
| Cys        | TGT   | TGC |     |     |     |     |     |     |
| Gln        | CAG   | CAA |     |     |     |     |     |     |
| Glu        | GAG   | GAA |     |     |     |     |     |     |
| Gly        | GGT   | GGG | GGA | GGC |     |     |     |     |
| His        | CAT   | CAC |     |     |     |     |     |     |
| Ile        | ATT   | ATC |     |     |     |     |     |     |
| Leu        | TTG   | TTA | CTT | CTG | CTA | CTC |     |     |
| Lys        | AAG   | AAA |     |     |     |     |     |     |
| Met        | ATG   | ATA |     |     |     |     |     |     |
| Phe        | TTT   | TTC |     |     |     |     |     |     |
| Pro        | CCT   | CCG | CCA | CCC |     |     |     |     |
| Ser        | TCT   | AGT | AGG | AGA | TCA | TGC | AGC | TCC |
| Thr        | ACT   | ACA | ACG | ACC |     |     |     |     |
| Trp        | TGG   | TGA |     |     |     |     |     |     |
| Tyr        | TAT   | TAC |     |     |     |     |     |     |
| Val        | GTT   | GTG | GTA | GTC | TTG | GTT |     |     |
| Start      | ATT   | TAT | GTA | CTT |     |     |     |     |
| Stop       | TAG   | TAA | T   |     |     |     |     |     |
